# Supplementary material for: Chuanhu Anti-Gout Mixture versus Colchicine for Acute Gouty Arthritis: A Randomized, Double-Blind, Double-Dummy, Non-Inferiority Trial
Source: PubMed Central journal article supplement — Int J Med Sci. 2014 Jun 14;11(9):880–5. doi: 10.7150/ijms.9165 (PMC4081309; doi:10.7150/ijms.9165), 2014-06-14
Supplement: ijmsv11p0880s1.pdf [file ijmsv11p0880s1.pdf]

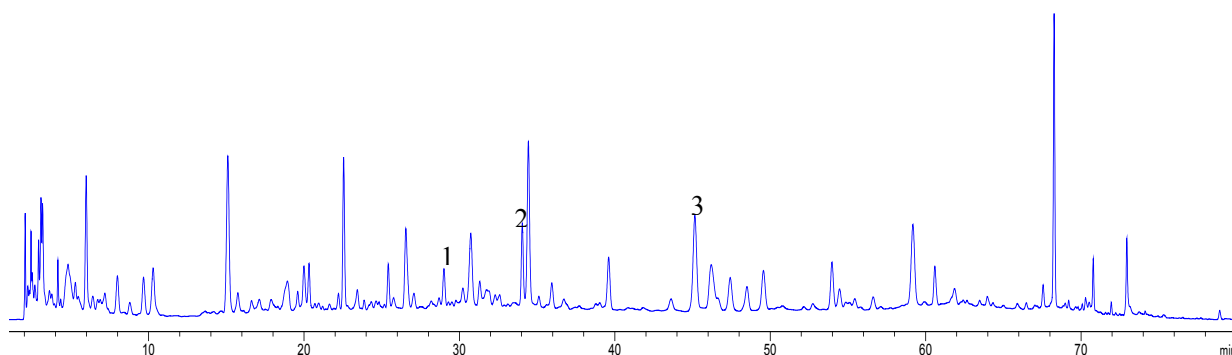

**Figure S1 The TCM fingerprint of the known active ingredients of the Chuanhu anti-gout mixture**

1: Chlorogenic acid: 205.6  $\mu\text{g/ml}$  2: Loganin: 36.2  $\mu\text{g/ml}$  3: Resveratrol: 149.2  $\mu\text{g/ml}$
